# Supplementary material for: Assessment of Sexual Function in Male Patients Undergoing Hydrocelectomy and Their Partners: A Prospective Study Based on IIEF an FSFI Scores
Source: Research Square preprint supplement (doi:10.21203/rs.3.rs-7142588/v1), 2025-08-12
Supplement: Supplementary file 1 [file 11719bb11e321c20768149ea.pdf]

**Table 1.** Demographic characteristics, history and physical examination findings of the patients

| Demographic characteristics                                                                                                                                                                                              | Value      |
|--------------------------------------------------------------------------------------------------------------------------------------------------------------------------------------------------------------------------|------------|
| HT <sup>a</sup>                                                                                                                                                                                                          | 27 (33.8%) |
| DM <sup>a</sup>                                                                                                                                                                                                          | 9 (11.3%)  |
| HT+DM <sup>a</sup>                                                                                                                                                                                                       | 14 (17.5%) |
| CAD <sup>a</sup>                                                                                                                                                                                                         | 1 (1.3%)   |
| Other <sup>a</sup>                                                                                                                                                                                                       | 1 (1.3%)   |
| Age <sup>b</sup> (years)                                                                                                                                                                                                 | 50.53±2.64 |
| Vertical hydrocele size <sup>b</sup> (cm)                                                                                                                                                                                | 13.38±4.18 |
| Transverse hydrocele size <sup>b</sup> (cm)                                                                                                                                                                              | 7.31±2.16  |
| (Abbreviations: HT, hipertension; DM, diabetes mellitus, CAD: coronary artery disease.<br><sup>a</sup> Data were expressed as count and percentage.<br><sup>b</sup> Data were expressed as mean and standart deviation.) |            |
